# Supplementary material
Source: ML conference proceedings conference paper supplement (https://openreview.net/forum?id=2fdf7KYeTE)
Supplement: supplementary_material [file attachment]

# 3D Reconstruction and Novel View Synthesis of Indoor Environments based on a Dual Neural Radiance Field

Anonymous Authors

## 1 ADDITIONAL ABLATION STUDY

**Effect of the depth alignment loss.** We conduct experiments to verify the importance of  $\lambda_{\text{align}}$  to color decomposition, as shown in fig. 1. It can be seen that without  $\lambda_{\text{align}}$ , the generated depth image is very coarse and the wall and mirror are not smooth while the method with  $\lambda_{\text{align}}$  gives the accurate depth image. Besides, without  $\lambda_{\text{align}}$  the method seems to fail to decompose color into the view-independent component and the view-dependent component, especially in mirror region and wall regions.

**Effect of self-supervised loss.** We conduct experiments to verify the impact of different  $\lambda_d$  on reconstruction performance and rendering quality. Experimental results show that an appropriate  $\lambda_d$  value is crucial to balance the effects of color and depth supervision. Specifically, smaller  $\lambda_d$  results in enhancing the effect of the depth loss and reducing the effect of the view-independent color supervision, while larger  $\lambda_d$  increases the effect of color supervision and decreases the effect of depth supervision. We carry out experiments with the different values of  $\lambda_d$  ranging from 0.5 to 50. The results in table 1 show that  $\lambda_d = 5$  gives the best performance. In addition, the performance drops whenever  $\lambda_d$  is larger or smaller.

**Table 1: Ablation study of self-supervised loss. We evaluate the effect of different values of  $\lambda_d$  on the view synthesis and reconstruction. It can be seen that best performance is obtained when  $\lambda_d$  is 5. Worse results are achieved whenever  $\lambda_d$  increases or decreases.**

| $\lambda_d$ | C- $l_1$ ↓    | F-score ↑    | PSNR ↑        | LPIPS ↓       |
|-------------|---------------|--------------|---------------|---------------|
| 0.5         | 0.0132        | <b>0.985</b> | 36.926        | 0.0344        |
| 2.0         | 0.0134        | <b>0.985</b> | 37.076        | 0.0353        |
| 5.0 (Ours)  | <b>0.0128</b> | <b>0.985</b> | <b>37.167</b> | <b>0.0324</b> |
| 10.0        | 0.0132        | <b>0.985</b> | 37.146        | 0.0332        |
| 50.0        | 0.0131        | <b>0.985</b> | 36.713        | 0.0359        |

## 2 ADDITIONAL EXPERIMENTAL RESULTS

### 2.1 More detailed experiment results

Additional qualitative results are shown in figs. 3 and 4.

We compare the proposed method with *BundleFusion*, *Neus*, *VolSDF*, *NeuralRGBD* and *Go-Surf* in Scene *Grey-white room*, *Office2*, *Office3*, *Room0* for geometry reconstruction, as shown in fig. 3. Our method achieves the best visual result on all indoor scenes. It can be seen from fig. 3 that our method has richer object details and smoother planes of indoor scenes. Specifically, Our method fills in the office chair legs completely and achieves a smoother result on the background walls and floors in the second and third columns. In the last column, our method is able to reconstruct the complete table compared to *BundleFusion*, *Neus* and *NeuralRGBD*, and refine the shape of the bottle compared to *Go-Surf*.

In addition, view synthesis performance on *Whiteroom*, *Office3*, *Room0*, and *Room1* scenes of the *Neus*, *InstantNGP*, *DVGO*, *Go-Surf*

**Table 2: Model storage and runtime of Du-NeRF. We list *Scene size* ( $\text{m}^3$ ), *Model size*, number of parameters (*Params.*) and *Runtime*. Our method reaches convergence in at most 1 hour for all scenes.**

| Scene                    | Scene size                   | Model size | Params. | Runtime |
|--------------------------|------------------------------|------------|---------|---------|
| <b>Breakfast room</b>    | $4.1 \times 3.3 \times 4.7$  | 116 MB     | 28.9 M  | 50 min  |
| <b>Green room</b>        | $8.0 \times 3.1 \times 4.7$  | 170 MB     | 42.5 M  | 53 min  |
| <b>Grey-white room</b>   | $5.9 \times 3.1 \times 4.4$  | 127 MB     | 31.7 M  | 50 min  |
| <b>ICL living room</b>   | $5.3 \times 2.9 \times 5.4$  | 128 MB     | 32.1 M  | 51 min  |
| <b>Complete kitchen</b>  | $9.3 \times 3.3 \times 10.0$ | 298 MB     | 74.1 M  | 73 min  |
| <b>Kitchen</b>           | $7.0 \times 3.4 \times 8.7$  | 229 MB     | 57.0 M  | 61 min  |
| <b>Morning apartment</b> | $3.5 \times 2.3 \times 4.0$  | 81 MB      | 20.3 M  | 47 min  |
| <b>Staircase</b>         | $6.8 \times 3.7 \times 6.5$  | 206 MB     | 51.7 M  | 63 min  |
| <b>Thin Geometry</b>     | $3.4 \times 1.2 \times 3.6$  | 65 MB      | 16.3 M  | 48 min  |
| <b>White room</b>        | $5.6 \times 3.8 \times 7.8$  | 201 MB     | 50.3 M  | 59 min  |
| <b>Office0</b>           | $4.7 \times 5.3 \times 3.3$  | 130 MB     | 32.5 M  | 41 min  |
| <b>Office1</b>           | $5.2 \times 4.5 \times 3.3$  | 115 MB     | 28.9 M  | 42 min  |
| <b>Office2</b>           | $6.8 \times 8.5 \times 3.2$  | 230 MB     | 57.4 M  | 52 min  |
| <b>Office3</b>           | $9.0 \times 9.7 \times 3.5$  | 298 MB     | 74.5 M  | 70 min  |
| <b>Office4</b>           | $6.9 \times 6.9 \times 3.2$  | 193 MB     | 48.3 M  | 48 min  |
| <b>Room0</b>             | $8.2 \times 5.1 \times 3.2$  | 170 MB     | 42.7 M  | 46 min  |
| <b>Room1</b>             | $7.1 \times 6.1 \times 3.1$  | 175 MB     | 43.7 M  | 45 min  |
| <b>Room2</b>             | $7.2 \times 5.3 \times 4.0$  | 184 MB     | 45.9 M  | 46 min  |

and *NeuralRGBD*, are shown in fig. 4. Our approach achieves the best image rendering results, in both the texture-less areas and rich texture areas. For instance, we accurately restore the appearance of texture-less regions such as ceiling corners in the first column and walls in the second and third columns. Additionally, we reproduce the details of complex texture regions, such as the shutter in the third column and the stripes of the quilt in the last column. Methods that focus on view rendering such as *DVGO* and *InstantNGP* suffer in texture-less or sparsely observed regions, as shown in the first and third columns of fig. 4. Approaches focus on surface reconstruction, such as *NeuralRGBD* and *Go-Surf*, often struggle to get good view rendering results on areas of complex texture such as the windows in the third column and the quilt in the fourth column.

The detailed quantitative results on Replica dataset and NeuralRGBD dataset can be seen in table 5 and in tables 3 and 4, respectively. Our method obtains the SOTA rendering performance in all scenes and gives the highest performance in most of the scenes for geometry reconstruction.

### 2.2 More color decomposition results

More color decomposition results are shown in fig. 2. We can see that our method successfully decomposes the full color into view-independent color and view-dependent color such as the reflective table, the book and the TV.

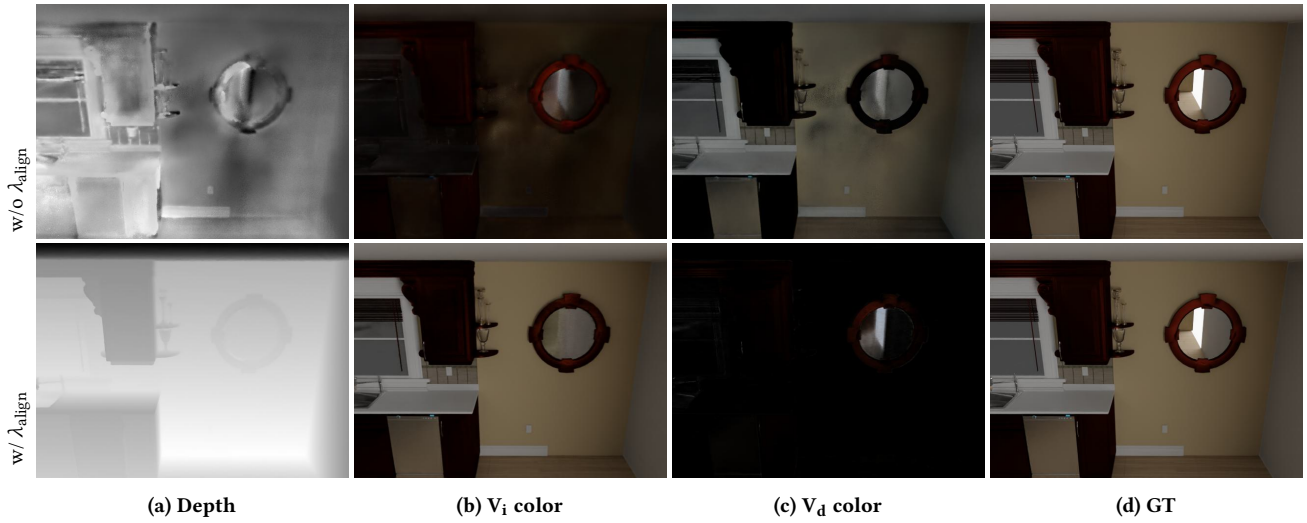

**Figure 1: We evaluate the effect of different  $\lambda_{\text{align}}$  on the generated view-independent color. The first row shows the results w/o  $\lambda_{\text{align}}$ , while second for w/  $\lambda_{\text{align}}$ . The (a), (b), (c) are the rendering depth map, view-independent color, and view-dependent color, respectively, while (d) is the complete images. The experimental results indicate that we could not get an accurate diffuse component without  $\lambda_{\text{align}}$ .**

### 3 RUNTIME AND MEMORY REQUIREMENTS

There is a detailed breakdown of the runtime and memory usage in our experiments on all of the datasets, as shown in table 2. It can be

seen that our method could reach convergence in at most 1 hour on all scenes. Similar to previous methods that trade memory for time, Du-NeRF requires hundreds of MB to store the multi-resolution grid.

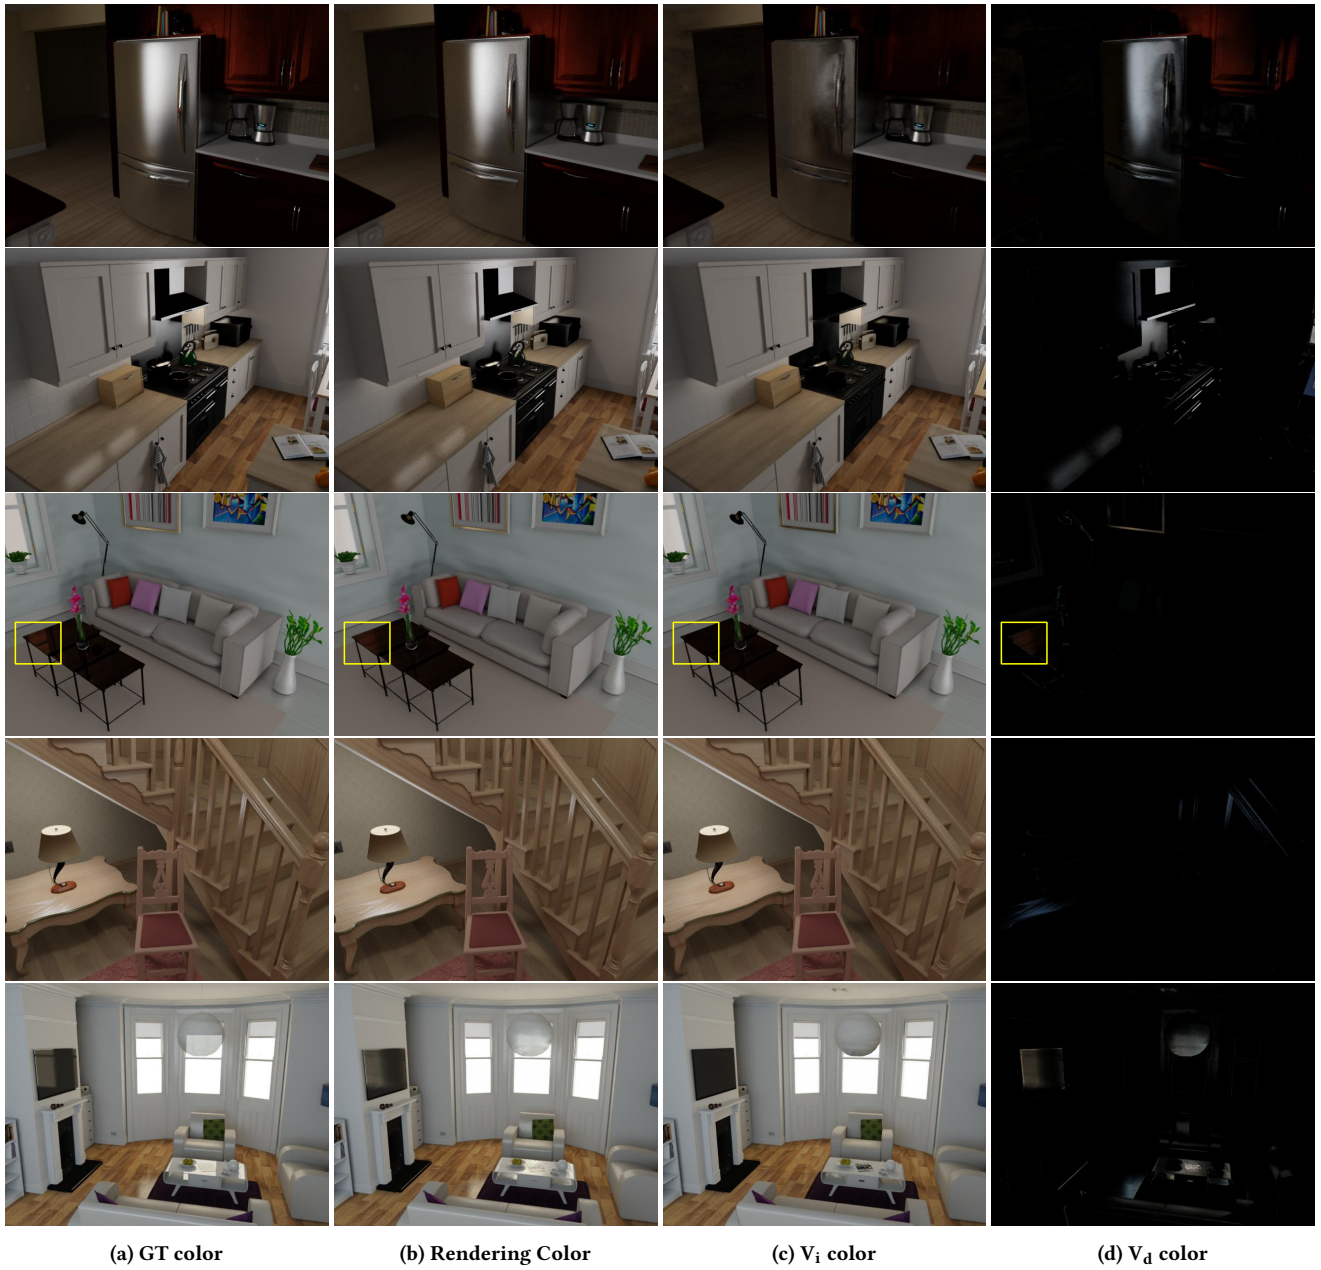

**Figure 2: More color decoupling results. The  $V_i$  color represents the view-independent color, while  $V_d$  color is the view-dependent color. It can be seen that our method can effectively decouple the complete color into the view-independent (diffusion surfaces) and view-dependent (specular reflective surfaces) colors.**

| Scene            | Method       | Acc ↓         | Com ↓         | C- $l_1$ ↓    | NC ↑          | F-score ↑     | PSNR ↑         | SSIM ↑        | LPIPS ↓       |
|------------------|--------------|---------------|---------------|---------------|---------------|---------------|----------------|---------------|---------------|
| Breakfast Room   | BundleFusion | 0.0134        | 0.2000        | 0.1070        | 0.9170        | 0.8000        | -              | -             | -             |
|                  | Neus         | 0.6270        | 0.7720        | 0.7000        | 0.6410        | 0.0100        | 27.2880        | 0.8230        | 0.1940        |
|                  | VolSDF       | 0.0820        | 0.3360        | 0.2090        | 0.6880        | 0.2970        | 28.9610        | 0.8730        | 0.1570        |
|                  | NeuralRGBD   | 0.0145        | 0.0148        | 0.0147        | 0.9650        | 0.9900        | 32.5340        | 0.9280        | 0.1090        |
|                  | GO-Surf      | <b>0.0141</b> | 0.0150        | 0.0145        | 0.9630        | 0.9810        | 29.0600        | 0.8830        | 0.1650        |
|                  | InstantNGP   | 0.2310        | 0.2970        | 0.2640        | 0.5670        | 0.2420        | 31.6560        | 0.8970        | 0.0853        |
|                  | DVGO         | 0.5310        | 0.9010        | 0.7160        | 0.5100        | 0.0184        | 34.2720        | 0.9530        | 0.0640        |
|                  | <b>Ours</b>  | <b>0.0141</b> | <b>0.0135</b> | <b>0.0138</b> | <b>0.9640</b> | <b>0.9860</b> | <b>38.2610</b> | <b>0.9830</b> | <b>0.0238</b> |
| Complete Kitchen | BundleFusion | 0.0366        | 1.0780        | 0.5570        | 0.7470        | 0.4450        | -              | -             | -             |
|                  | Neus         | 0.2950        | 1.5580        | 0.9270        | 0.5610        | 0.0641        | 26.3270        | 0.8410        | 0.2540        |
|                  | VolSDF       | 0.3260        | 0.9100        | 0.6180        | 0.6800        | 0.1470        | 26.0160        | 0.8570        | 0.2400        |
|                  | NeuralRGBD   | <b>0.0189</b> | 0.1100        | 0.0647        | 0.8960        | 0.8790        | 32.0310        | 0.9100        | 0.2020        |
|                  | GO-Surf      | 0.0254        | 0.0295        | 0.0274        | 0.9395        | 0.8930        | 29.6040        | 0.8680        | 0.1760        |
|                  | InstantNGP   | 0.1950        | 0.8730        | 0.5340        | 0.5740        | 0.2350        | 30.4066        | 0.8850        | 0.1470        |
|                  | DVGO         | 0.2970        | 1.1580        | 0.7280        | 0.5610        | 0.1990        | 31.0570        | 0.9010        | 0.2180        |
|                  | <b>Ours</b>  | 0.0222        | <b>0.0259</b> | <b>0.0240</b> | <b>0.9410</b> | <b>0.9010</b> | <b>34.5170</b> | <b>0.9520</b> | <b>0.0682</b> |
| Green Room       | BundleFusion | 0.0140        | 0.1965        | 0.1053        | 0.9090        | 0.8140        | -              | -             | -             |
|                  | Neus         | 0.2130        | 0.3430        | 0.2780        | 0.7400        | 0.1130        | 29.4000        | 0.8930        | 0.1450        |
|                  | VolSDF       | 0.1360        | 0.4320        | 0.2840        | 0.6490        | 0.2250        | 29.8840        | 0.9100        | 0.1380        |
|                  | NeuralRGBD   | <b>0.0104</b> | <b>0.0140</b> | <b>0.0122</b> | <b>0.9340</b> | <b>0.9910</b> | 34.0800        | 0.9520        | 0.0770        |
|                  | GO-Surf      | 0.0124        | 0.0156        | 0.0140        | 0.9275        | 0.9825        | 31.0520        | 0.9220        | 0.1170        |
|                  | InstantNGP   | 0.2440        | 0.9710        | 0.6070        | 0.5370        | 0.1180        | 34.9470        | 0.9460        | 0.0364        |
|                  | DVGO         | 0.2940        | 0.5190        | 0.4070        | 0.5640        | 0.2490        | 34.9800        | 0.9550        | 0.0760        |
|                  | <b>Ours</b>  | 0.0122        | 0.0150        | 0.0136        | 0.9290        | 0.9850        | <b>38.5530</b> | <b>0.9780</b> | <b>0.0247</b> |
| Grey White Room  | BundleFusion | 0.0202        | 0.2743        | 0.1472        | 0.8230        | 0.7380        | -              | -             | -             |
|                  | Neus         | 0.2620        | 0.4820        | 0.3720        | 0.6290        | 0.1160        | 28.7820        | 0.8630        | 0.1640        |
|                  | VolSDF       | 0.1930        | 0.3360        | 0.2650        | 0.7070        | 0.2550        | 30.4400        | 0.8950        | 0.1480        |
|                  | NeuralRGBD   | <b>0.0134</b> | <b>0.0151</b> | <b>0.0143</b> | <b>0.9310</b> | <b>0.9940</b> | 35.1630        | 0.9470        | 0.0900        |
|                  | GO-Surf      | 0.0145        | 0.0167        | 0.0156        | 0.9255        | 0.9875        | 30.8900        | 0.9115        | 0.1490        |
|                  | InstantNGP   | 0.1390        | 0.9380        | 0.5390        | 0.5010        | 0.1810        | 32.0200        | 0.8790        | 0.1270        |
|                  | DVGO         | 0.2410        | 0.4430        | 0.3420        | 0.5640        | 0.2990        | 34.7160        | 0.9470        | 0.0930        |
|                  | <b>Ours</b>  | 0.0140        | 0.0155        | 0.0147        | 0.9260        | 0.9900        | <b>37.7320</b> | <b>0.9700</b> | <b>0.0406</b> |
| Icl Living Room  | BundleFusion | 0.0104        | 0.2697        | 0.1400        | 0.9120        | 0.7720        | -              | -             | -             |
|                  | Neus         | 0.3570        | 0.8040        | 0.5810        | 0.6270        | 0.1000        | 31.9550        | 0.9010        | 0.1090        |
|                  | VolSDF       | 0.2520        | 0.8130        | 0.5330        | 0.6370        | 0.1450        | 30.6400        | 0.8980        | 0.1400        |
|                  | NeuralRGBD   | <b>0.0089</b> | 0.0840        | 0.0462        | 0.9070        | 0.9010        | 34.3810        | 0.9300        | 0.1960        |
|                  | GO-Surf      | 0.0101        | 0.0129        | 0.0115        | 0.9670        | 0.9910        | 31.7410        | 0.9080        | 0.2425        |
|                  | InstantNGP   | 0.7180        | 1.8900        | 1.3000        | 0.5140        | 0.0100        | 27.1670        | 0.7650        | 0.2760        |
|                  | DVGO         | 0.3000        | 0.8670        | 0.5830        | 0.5430        | 0.2130        | 33.9930        | 0.9330        | 0.2420        |
|                  | <b>Ours</b>  | 0.0112        | <b>0.0140</b> | <b>0.0126</b> | <b>0.9690</b> | <b>0.9920</b> | <b>36.9860</b> | <b>0.9570</b> | <b>0.0638</b> |

Table 3: Reconstruction and view synthesis results of NeuralRGBD dataset. The best performances are highlighted in bold.



| Scene             | Method       | Acc ↓         | Com ↓         | C- $l_1$ ↓    | NC ↑          | F-score ↑     | PSNR ↑         | SSIM ↑        | LPIPS ↓       |
|-------------------|--------------|---------------|---------------|---------------|---------------|---------------|----------------|---------------|---------------|
| Kitchen           | BundleFusion | 0.0170        | 0.5960        | 0.3065        | 0.8510        | 0.6390        | -              | -             | -             |
|                   | Neus         | 0.4680        | 0.8490        | 0.6580        | 0.5740        | 0.0400        | 25.5880        | 0.8240        | 0.2340        |
|                   | VolSDF       | 0.2130        | 0.3760        | 0.2950        | 0.7000        | 0.2810        | 25.7570        | 0.8520        | 0.2300        |
|                   | NeuralRGBD   | <b>0.0198</b> | <b>0.1450</b> | 0.0824        | 0.9000        | 0.8630        | 31.6270        | 0.9170        | 0.1480        |
|                   | GO-Surf      | 0.0204        | 0.0265        | <b>0.0235</b> | <b>0.9340</b> | <b>0.9430</b> | 27.8260        | 0.8735        | 0.2000        |
|                   | InstantNGP   | 0.1620        | 0.6470        | 0.4050        | 0.5520        | 0.2360        | 29.3850        | 0.8650        | 0.1380        |
|                   | DVGO         | 0.2690        | 0.5120        | 0.3900        | 0.5640        | 0.3340        | 30.5230        | 0.9360        | 0.1310        |
|                   | Ours         | 0.0207        | 0.0266        | 0.0236        | 0.9330        | 0.9400        | <b>35.6100</b> | <b>0.9650</b> | <b>0.0458</b> |
|                   |              |               |               |               |               |               |                |               |               |
| Morning Apartment | BundleFusion | 0.0093        | 0.0153        | 0.0123        | 0.8880        | 0.9760        | -              | -             | -             |
|                   | Neus         | 0.2130        | 0.2430        | 0.2280        | 0.6660        | 0.2180        | 27.5640        | 0.8370        | 0.2090        |
|                   | VolSDF       | 0.0804        | 0.1450        | 0.1130        | 0.7300        | 0.3700        | 29.2440        | 0.8870        | 0.1660        |
|                   | NeuralRGBD   | <b>0.0088</b> | <b>0.0117</b> | <b>0.0103</b> | <b>0.8920</b> | <b>0.9870</b> | 33.1350        | 0.9270        | 0.1080        |
|                   | GO-Surf      | 0.0106        | 0.0145        | 0.0125        | 0.8840        | 0.9750        | 28.3880        | 0.8570        | 0.2245        |
|                   | InstantNGP   | 0.4260        | 0.4920        | 0.4590        | 0.5030        | 0.1000        | 24.2740        | 0.6230        | 0.4640        |
|                   | DVGO         | 0.1510        | 0.1760        | 0.1630        | 0.5480        | 0.5100        | 33.9590        | 0.9480        | 0.0740        |
|                   | Ours         | 0.0099        | 0.0136        | 0.0118        | 0.8870        | 0.9780        | <b>36.6370</b> | <b>0.9660</b> | <b>0.0392</b> |
|                   |              |               |               |               |               |               |                |               |               |
| Staircase         | BundleFusion | 0.0160        | 1.0020        | 0.5088        | 0.7960        | 0.4310        | -              | -             | -             |
|                   | Neus         | 0.3800        | 0.8910        | 0.6360        | 0.6190        | 0.1140        | 29.4540        | 0.8430        | 0.2710        |
|                   | VolSDF       | 0.1070        | 0.7340        | 0.4200        | 0.6720        | 0.2440        | 30.9470        | 0.8490        | 0.2570        |
|                   | NeuralRGBD   | <b>0.0213</b> | 0.0441        | 0.0327        | 0.9420        | 0.9010        | 34.8610        | 0.9070        | 0.2210        |
|                   | GO-Surf      | 0.0233        | 0.0285        | 0.0259        | 0.9490        | 0.8855        | 32.1520        | 0.8805        | 0.2560        |
|                   | InstantNGP   | 0.2880        | 0.3240        | 0.3060        | 0.5820        | 0.3130        | 31.1140        | 0.8250        | 0.2320        |
|                   | DVGO         | 0.2710        | 0.7460        | 0.5080        | 0.5750        | 0.2580        | 34.5150        | 0.9160        | 0.2200        |
|                   | Ours         | 0.0221        | <b>0.0268</b> | <b>0.0244</b> | <b>0.9510</b> | <b>0.9280</b> | <b>36.7910</b> | <b>0.9550</b> | <b>0.0710</b> |
|                   |              |               |               |               |               |               |                |               |               |
| Thin Geometry     | BundleFusion | 0.0227        | 0.0762        | 0.0495        | 0.8640        | 0.7160        | -              | -             | -             |
|                   | Neus         | 0.1550        | 0.5760        | 0.3650        | 0.5380        | 0.0860        | 19.2300        | 0.7830        | 0.1760        |
|                   | VolSDF       | 0.1140        | 0.3960        | 0.2550        | 0.5990        | 0.2710        | 24.7540        | 0.8900        | 0.1360        |
|                   | NeuralRGBD   | 0.0093        | 0.0254        | 0.0173        | <b>0.9090</b> | 0.9420        | 18.9310        | 0.6600        | 0.5580        |
|                   | GO-Surf      | 0.0107        | 0.0186        | 0.0146        | 0.9005        | 0.9440        | 25.8900        | 0.8820        | 0.1400        |
|                   | InstantNGP   | 0.0821        | 0.4290        | 0.2560        | 0.6130        | 0.3070        | 32.4840        | 0.9330        | 0.0347        |
|                   | DVGO         | 0.1040        | 0.0750        | 0.0900        | 0.5720        | 0.4750        | 35.1540        | 0.9680        | 0.0330        |
|                   | Ours         | <b>0.0087</b> | <b>0.0122</b> | <b>0.0105</b> | 0.9070        | <b>0.9790</b> | <b>34.1260</b> | <b>0.9640</b> | <b>0.0286</b> |
|                   |              |               |               |               |               |               |                |               |               |
| Whiteroom         | BundleFusion | 0.0184        | 0.8690        | 0.4440        | 0.8060        | 0.4700        | -              | -             | -             |
|                   | Neus         | 0.2040        | 0.3930        | 0.2980        | 0.6820        | 0.1710        | 29.0620        | 0.8770        | 0.1610        |
|                   | VolSDF       | 0.1240        | 0.3370        | 0.2300        | 0.7450        | 0.3870        | 30.5300        | 0.9050        | 0.1230        |
|                   | NeuralRGBD   | <b>0.0202</b> | 0.0437        | 0.0320        | 0.9200        | 0.9098        | 33.1980        | 0.9330        | 0.1240        |
|                   | GO-Surf      | 0.0225        | 0.0359        | 0.0292        | 0.9285        | 0.9070        | 29.2535        | 0.8985        | 0.1640        |
|                   | InstantNGP   | 0.1560        | 0.4570        | 0.3060        | 0.6060        | 0.3370        | 31.7830        | 0.9090        | 0.0956        |
|                   | DVGO         | 0.2230        | 0.5060        | 0.3650        | 0.5880        | 0.3130        | 33.1580        | 0.9400        | 0.0970        |
|                   | Ours         | 0.0214        | <b>0.0340</b> | <b>0.0277</b> | <b>0.9270</b> | <b>0.9210</b> | <b>36.2280</b> | <b>0.9690</b> | <b>0.0409</b> |
|                   |              |               |               |               |               |               |                |               |               |

Table 4: Reconstruction and view synthesis results of NeuralRGBD dataset. The best performances are highlighted in bold.

| Methods      | Evaluation | office0       | office1       | office2       | office3       | office4       | room0         | room1         | room2         | Mean          |
|--------------|------------|---------------|---------------|---------------|---------------|---------------|---------------|---------------|---------------|---------------|
| BundleFusion | C- $l_1$ ↓ | 0.0109        | 0.0110        | 0.0310        | 0.0660        | 0.0165        | 0.0587        | 0.0110        | 0.0339        | 0.0299        |
|              | F-score ↑  | 0.9880        | 0.9910        | 0.9190        | 0.8410        | 0.9690        | 0.8820        | 0.9900        | 0.9100        | 0.9360        |
|              | PSNR ↑     | -             | -             | -             | -             | -             | -             | -             | -             | -             |
|              | LPIPS ↓    | -             | -             | -             | -             | -             | -             | -             | -             | -             |
| Neus         | C- $l_1$ ↓ | 0.0154        | 0.2280        | 0.2390        | 0.2000        | 0.3440        | 0.2140        | 0.1570        | 0.2940        | 0.2288        |
|              | F-score ↑  | 0.2340        | 0.1800        | 0.1730        | 0.3050        | 0.0850        | 0.2300        | 0.2210        | 0.1240        | 0.1940        |
|              | PSNR ↑     | 33.274        | 33.874        | 26.372        | 26.893        | 28.546        | 25.913        | 28.068        | 28.570        | 28.939        |
|              | LPIPS ↓    | 0.1570        | 0.1240        | 0.1790        | 0.1640        | 0.1660        | 0.2660        | 0.2120        | 0.1790        | 0.1810        |
| VolSDF       | C- $l_1$ ↓ | 0.1270        | 0.2050        | 0.1820        | 0.2830        | 0.2980        | 0.2750        | 0.1580        | 0.2160        | 0.2180        |
|              | F-score ↑  | 0.4200        | 0.2440        | 0.4150        | 0.3250        | 0.2980        | 0.3280        | 0.3810        | 0.3010        | 0.3390        |
|              | PSNR ↑     | 34.327        | 35.733        | 28.996        | 27.943        | 30.595        | 26.374        | 28.807        | 30.227        | 30.375        |
|              | LPIPS ↓    | 0.1570        | 0.1120        | 0.1650        | 0.1730        | 0.1590        | 0.2660        | 0.2140        | 0.1560        | 0.1750        |
| NeuralRGBD   | C- $l_1$ ↓ | 0.0635        | <b>0.0088</b> | 0.0544        | 0.0177        | 0.3340        | 0.0892        | 0.1010        | 0.3480        | 0.1271        |
|              | F-score ↑  | 0.8550        | 0.9890        | 0.9380        | 0.9790        | 0.7040        | 0.8740        | 0.8420        | 0.5960        | 0.8470        |
|              | PSNR ↑     | 36.563        | 38.148        | 31.559        | 30.509        | 33.934        | 28.311        | 30.866        | 31.452        | 32.668        |
|              | LPIPS ↓    | 0.1640        | 0.1590        | 0.2000        | 0.1840        | 0.1600        | 0.2750        | 0.2410        | 0.2000        | 0.1980        |
| GO-Surf      | C- $l_1$ ↓ | 0.0099        | 0.0104        | 0.0125        | 0.0156        | 0.0133        | 0.0131        | 0.0103        | 0.0117        | 0.0121        |
|              | F-score ↑  | 0.9880        | 0.9925        | 0.9875        | 0.9825        | 0.9890        | 0.9935        | 0.9960        | <b>0.9880</b> | 0.9896        |
|              | PSNR ↑     | 35.105        | 35.655        | 29.059        | 29.138        | 31.784        | 27.378        | 29.522        | 30.096        | 30.967        |
|              | LPIPS ↓    | 0.1620        | 0.1740        | 0.2355        | 0.1940        | 0.1835        | 0.2975        | 0.2650        | 0.2270        | 0.2170        |
| InstantNGP   | C- $l_1$ ↓ | 0.2560        | 1.2320        | 0.4940        | 0.4940        | 1.1500        | 0.7870        | 0.6270        | 0.7900        | 0.7288        |
|              | F-score ↑  | 0.2010        | 0.1020        | 0.2660        | 0.2660        | 0.1030        | 0.1050        | 0.1510        | 0.0720        | 0.1583        |
|              | PSNR ↑     | 36.667        | 37.679        | 30.793        | 30.793        | 32.772        | 26.912        | 30.786        | 32.411        | 32.352        |
|              | LPIPS ↓    | 0.1710        | 0.0754        | 0.1240        | 0.1240        | 0.2140        | 0.2620        | 0.1350        | 0.0976        | 0.1500        |
| DVGO         | C- $l_1$ ↓ | 0.2160        | 0.2790        | 0.2010        | 0.3270        | 0.3660        | 0.4160        | 0.2470        | 0.3120        | 0.2955        |
|              | F-score ↑  | 0.3170        | 0.2040        | 0.3010        | 0.2470        | 0.1330        | 0.2360        | 0.2630        | 0.2110        | 0.2390        |
|              | PSNR ↑     | 36.859        | 37.878        | 31.596        | 28.349        | 32.583        | 26.985        | 30.250        | 31.192        | 31.962        |
|              | LPIPS ↓    | 0.1670        | 0.1640        | 0.2100        | 0.2260        | 0.2100        | 0.3500        | 0.2510        | 0.2090        | 0.2230        |
| Du-NeRF      | C- $l_1$ ↓ | <b>0.0096</b> | 0.0102        | <b>0.0116</b> | <b>0.0141</b> | <b>0.0118</b> | <b>0.0119</b> | <b>0.0093</b> | <b>0.0108</b> | <b>0.0112</b> |
|              | F-score ↑  | <b>0.9890</b> | <b>0.9930</b> | <b>0.9900</b> | <b>0.9860</b> | <b>0.9910</b> | <b>0.9950</b> | <b>0.9970</b> | <b>0.9880</b> | <b>0.9911</b> |
|              | PSNR ↑     | <b>41.365</b> | <b>41.922</b> | <b>34.913</b> | <b>34.622</b> | <b>37.776</b> | <b>34.184</b> | <b>36.123</b> | <b>35.928</b> | <b>37.104</b> |
|              | LPIPS ↓    | <b>0.0546</b> | <b>0.0630</b> | <b>0.0933</b> | <b>0.0790</b> | <b>0.0775</b> | <b>0.0824</b> | <b>0.0673</b> | <b>0.0790</b> | <b>0.0740</b> |

Table 5: Reconstruction and view synthesis results of Replica dataset. The best performances are highlighted in bold.

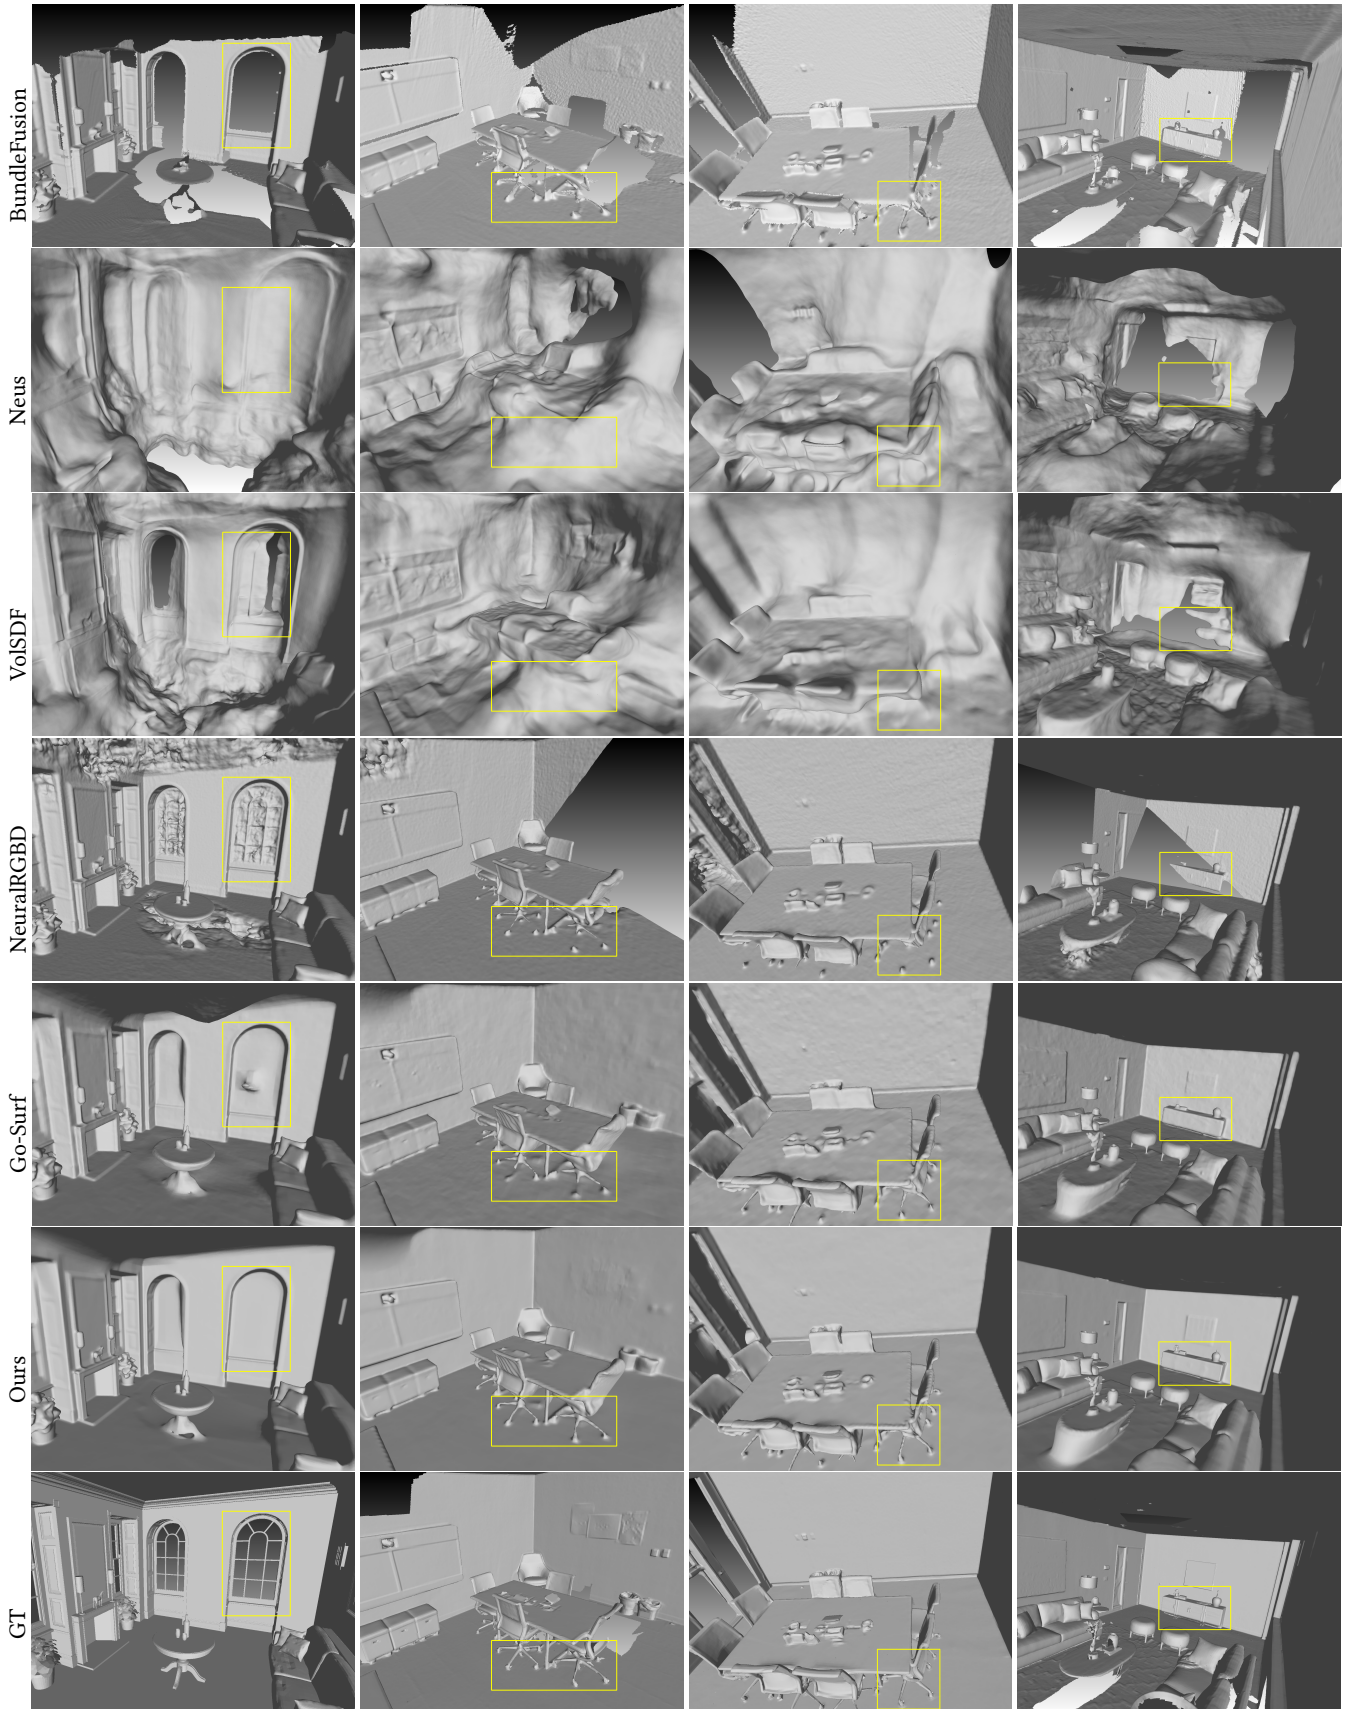

Figure 3: We show additional reconstruction results on the scene *Grey-white room*, *Office2*, *Office3* and *Room0*. Our approach allows for rich details and smoother planes highlighted in the yellow box.



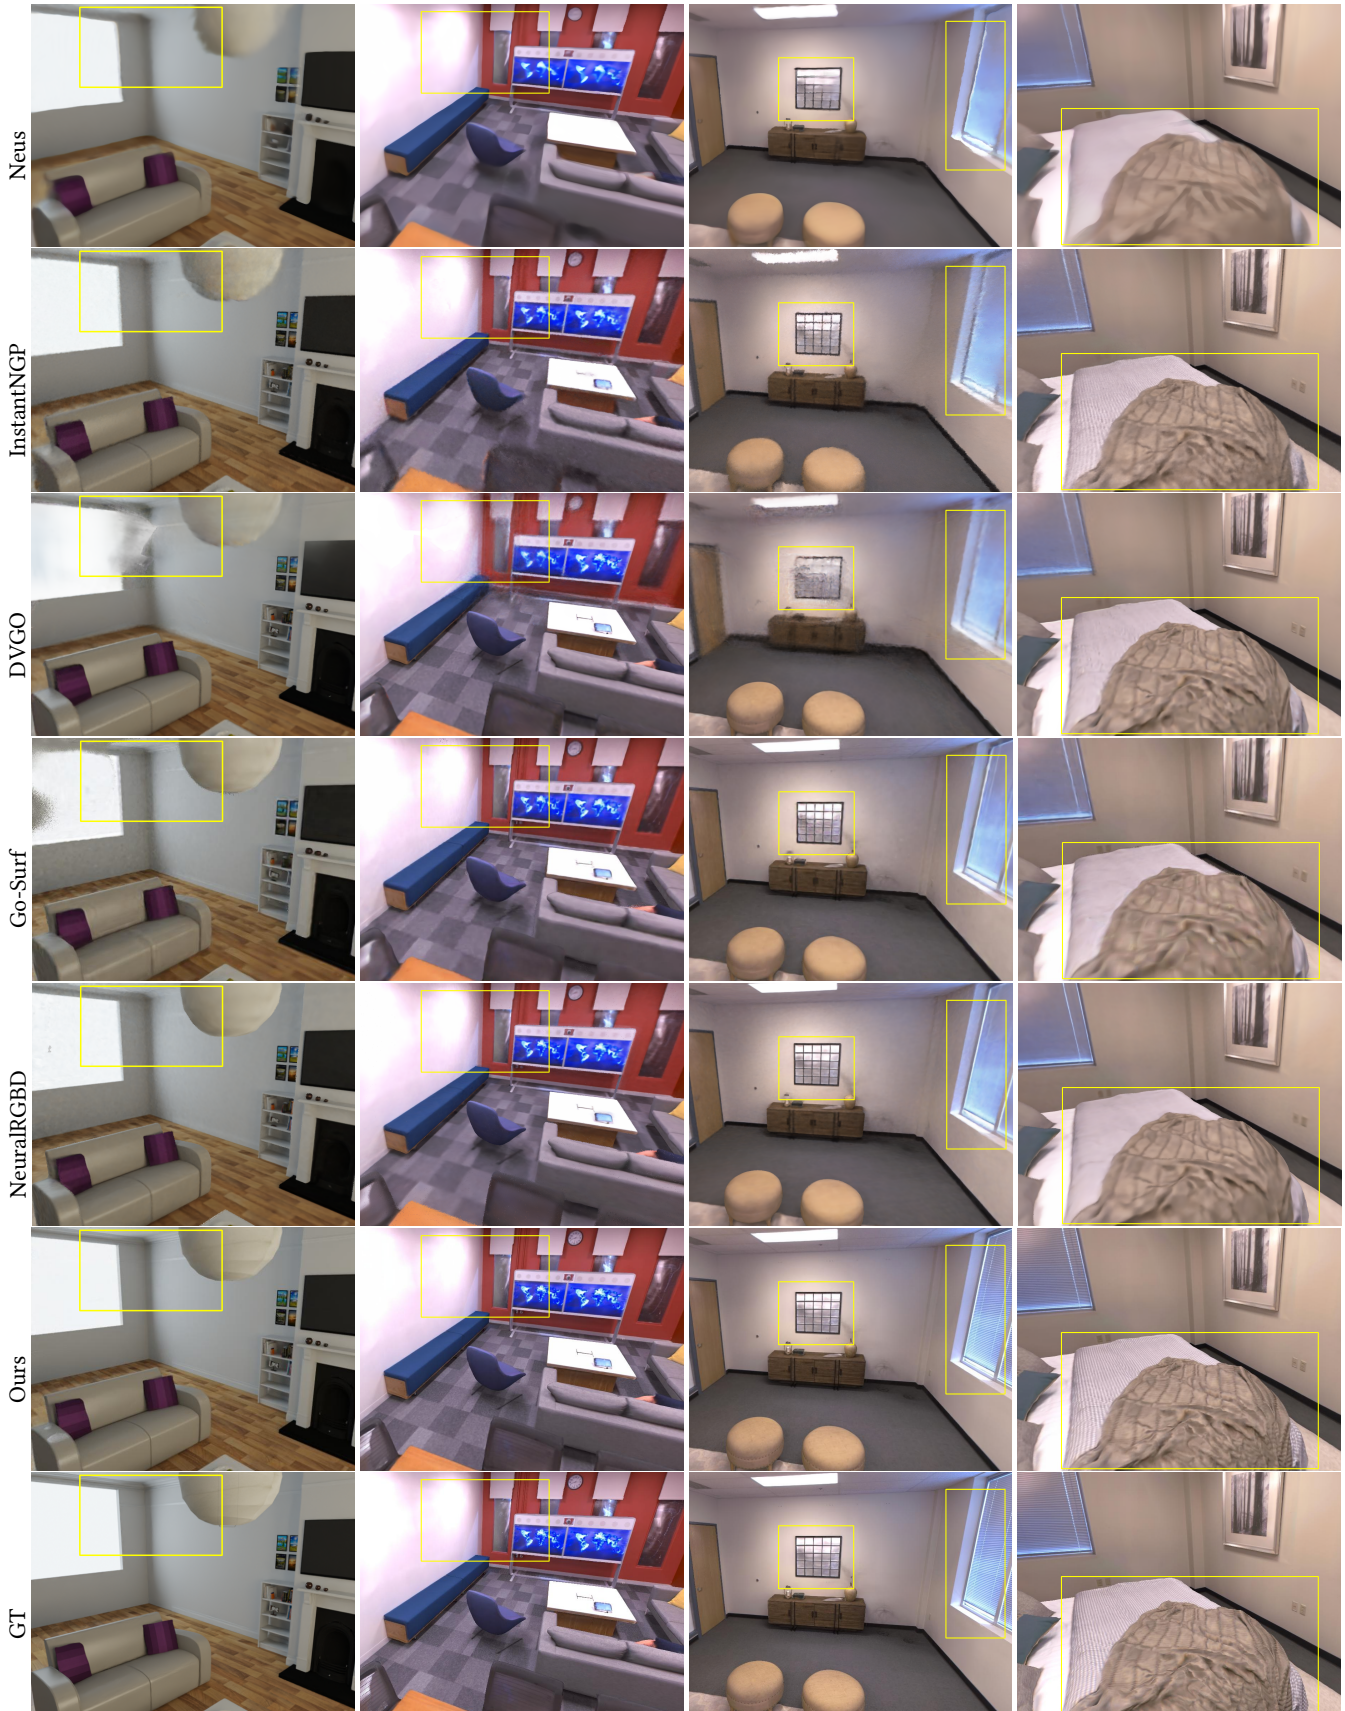

**Figure 4: Additional results of view synthesis on scenes *Whiteroom*, *Office3*, *Room0*, *Room1*. The methods for novel view synthesis, such as *InstantNGP*, *DVGO*, fail to render clear results at texture-less regions, and methods focusing on geometry reconstruction, such as *Neural-RGBD*, *Go-Surf*, fail to restore the appearance of the regions with complex texture.**
